# Supplementary material for: Identification of Properties and Structure of ι-Carrageenan Prepared with Different Alkali Treatment Times
Source: Research Square preprint supplement (doi:10.21203/rs.3.rs-7434025/v1), 2025-09-12

**Supplementary file**

**Identification of Properties and Structure of ι-Carrageenan Prepared with Different Alkali Treatment Times**

**Supplementary file:**

**Figure Caption**

**Fig. 1** Yield of ι-Carrageenan. a, b, c and d indicate significant differences (*p* < 0.05).

**Fig. 2** Gel strength of ι-Carrageenan. a and b indicate significant differences (*p* < 0.05).

**Fig. 3** The melting and gelling temperature of ι-carrageenan. a and b indicate significant differences (*p* < 0.05).

**Fig. 4** The apparent viscosity of ι-carrageenan.

**Fig. 5** The molecular weight of ι-carrageenan.

**Fig. 6** The WHC of ι-carrageenan. a and b indicate significant differences (*p* < 0.05).

**Fig. 7** The moisture distribution of carrageenan. (a) LF-NMR spectra, (b) The portion of peak area to total peak area for T21 and T22.

**Fig. 8** FT-IR spectra of ι-carrageenan.

**Fig. 9** XRD spectra of ι-carrageenan.

**Fig. 10** TGA analysis of ι-carrageenan (a) ι-2, (b) ι-3, (c) ι-4, (d) ι-5, (e) ι-6

**Fig. 1**


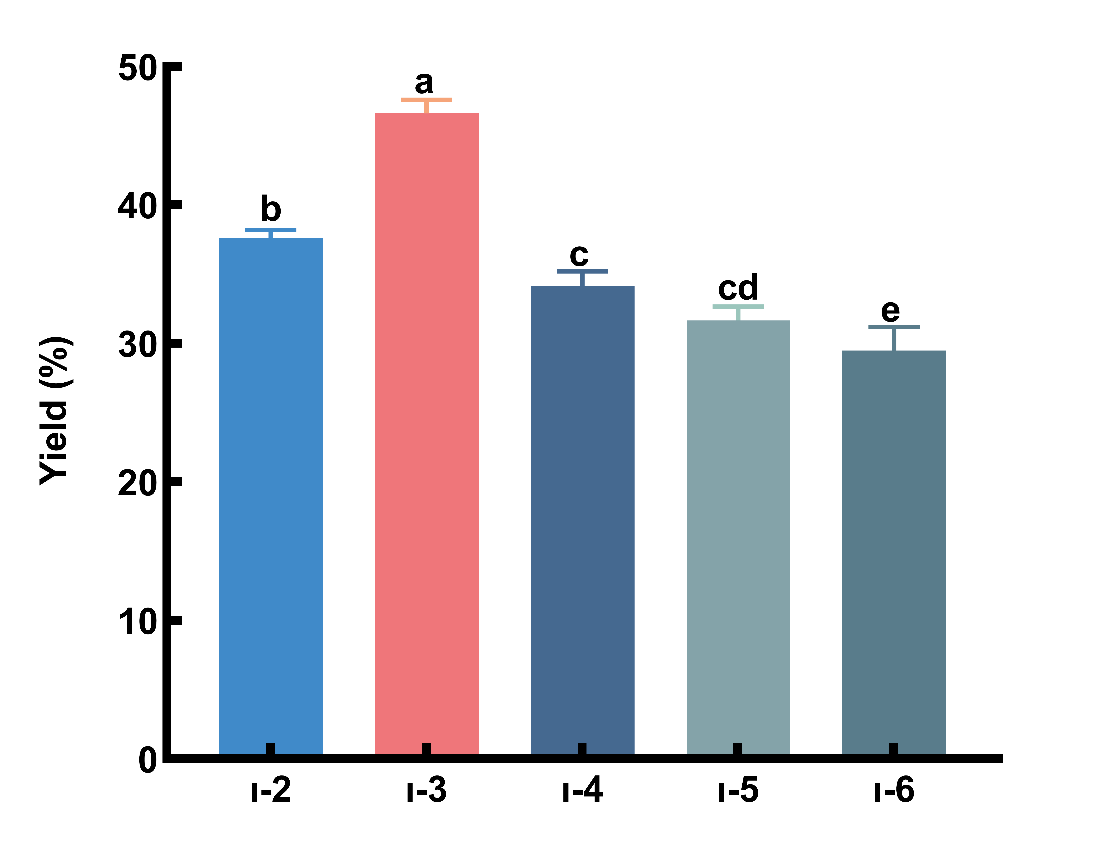


**Fig. 2**


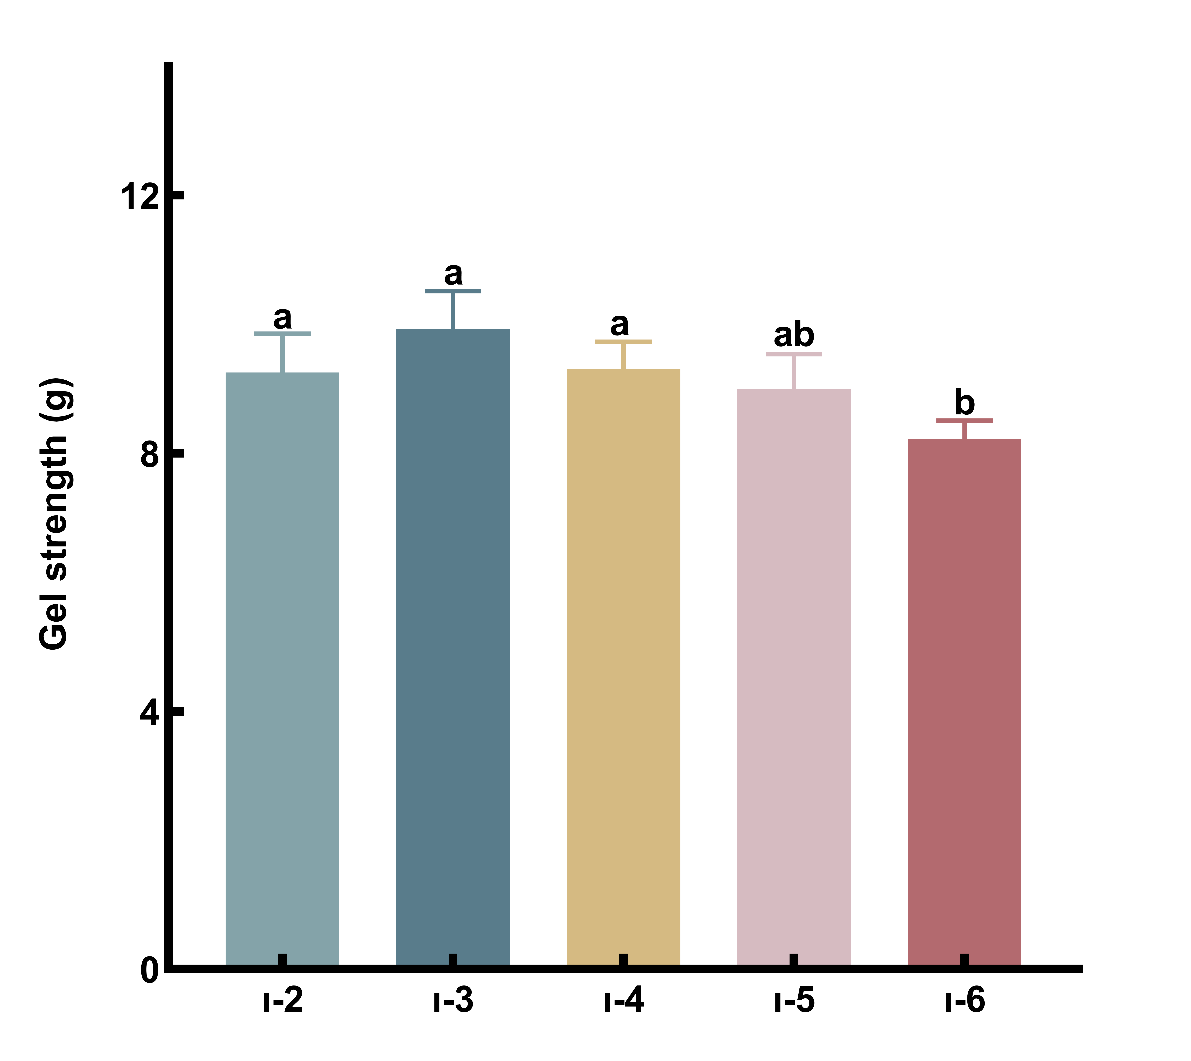


**Fig. 3**


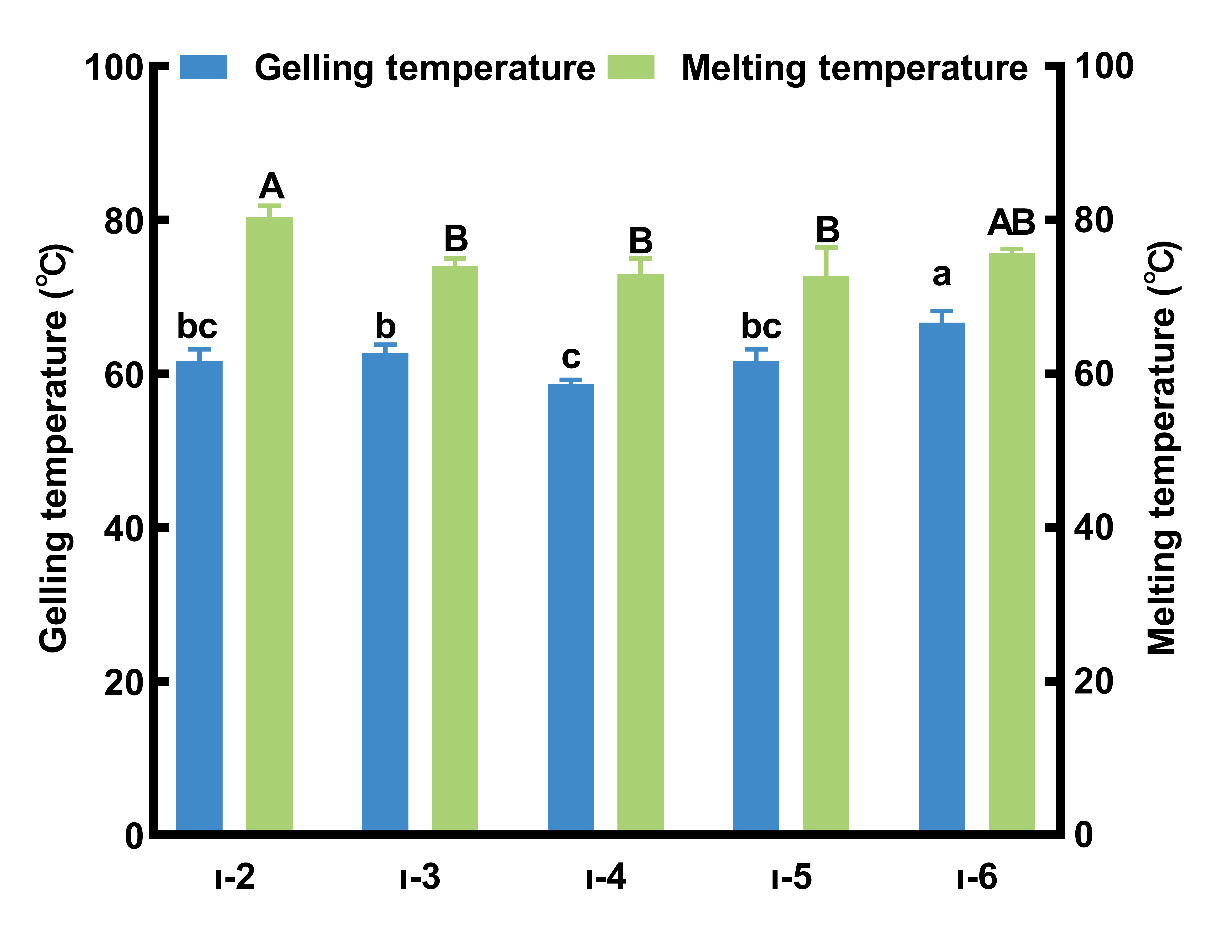


**Fig. 4**


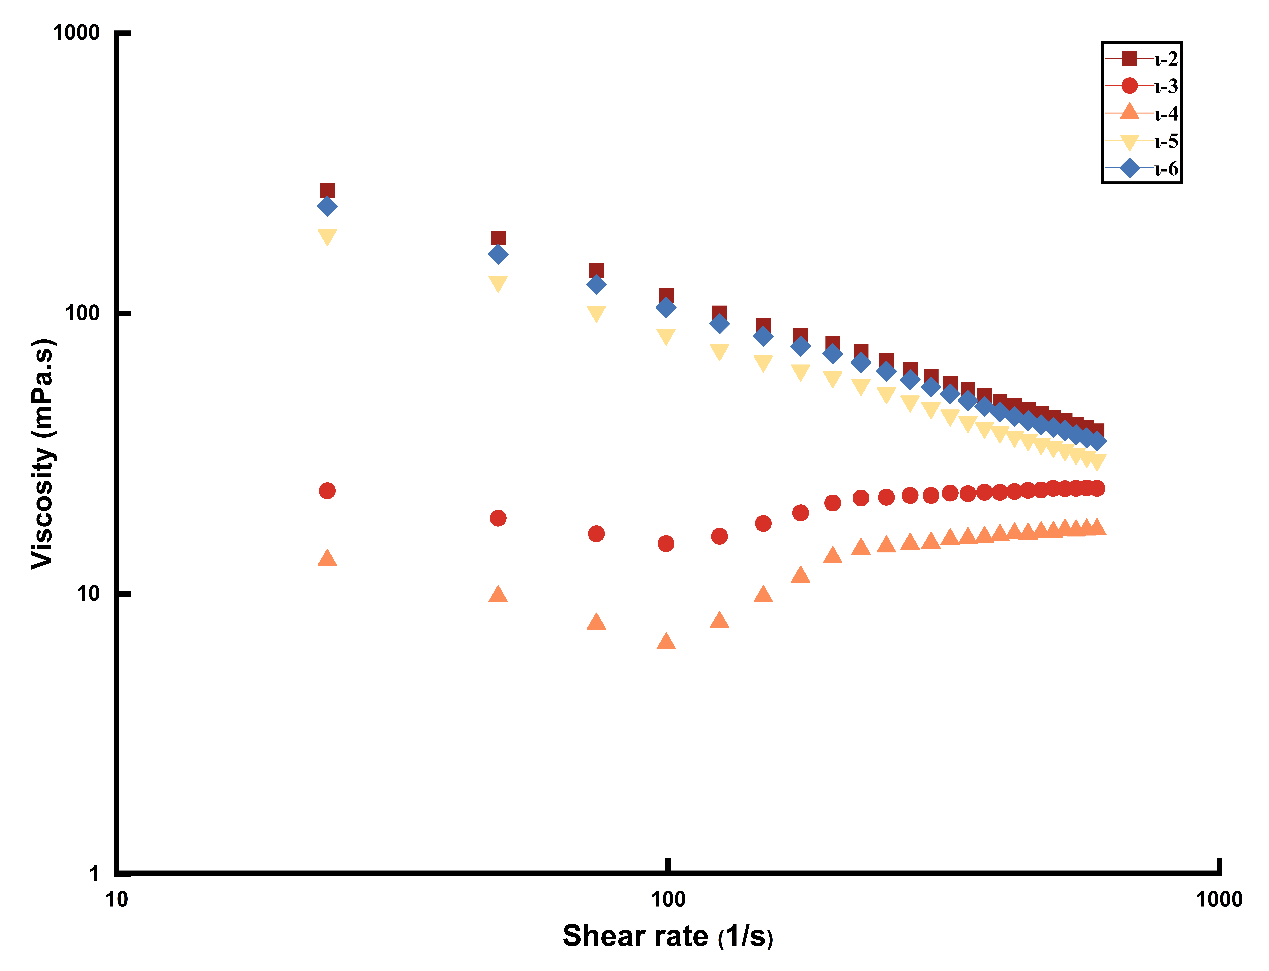


**Fig. 5**


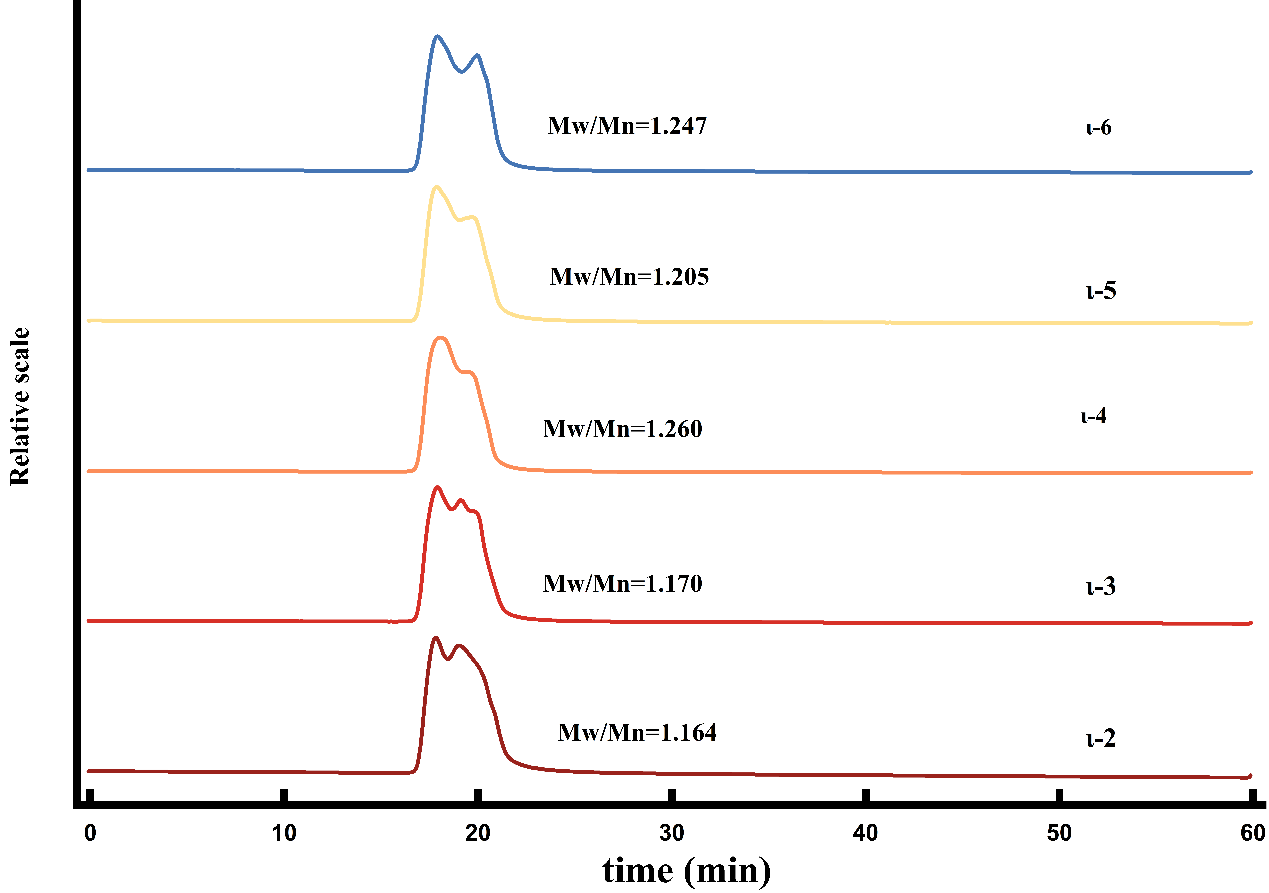


**Fig. 6**


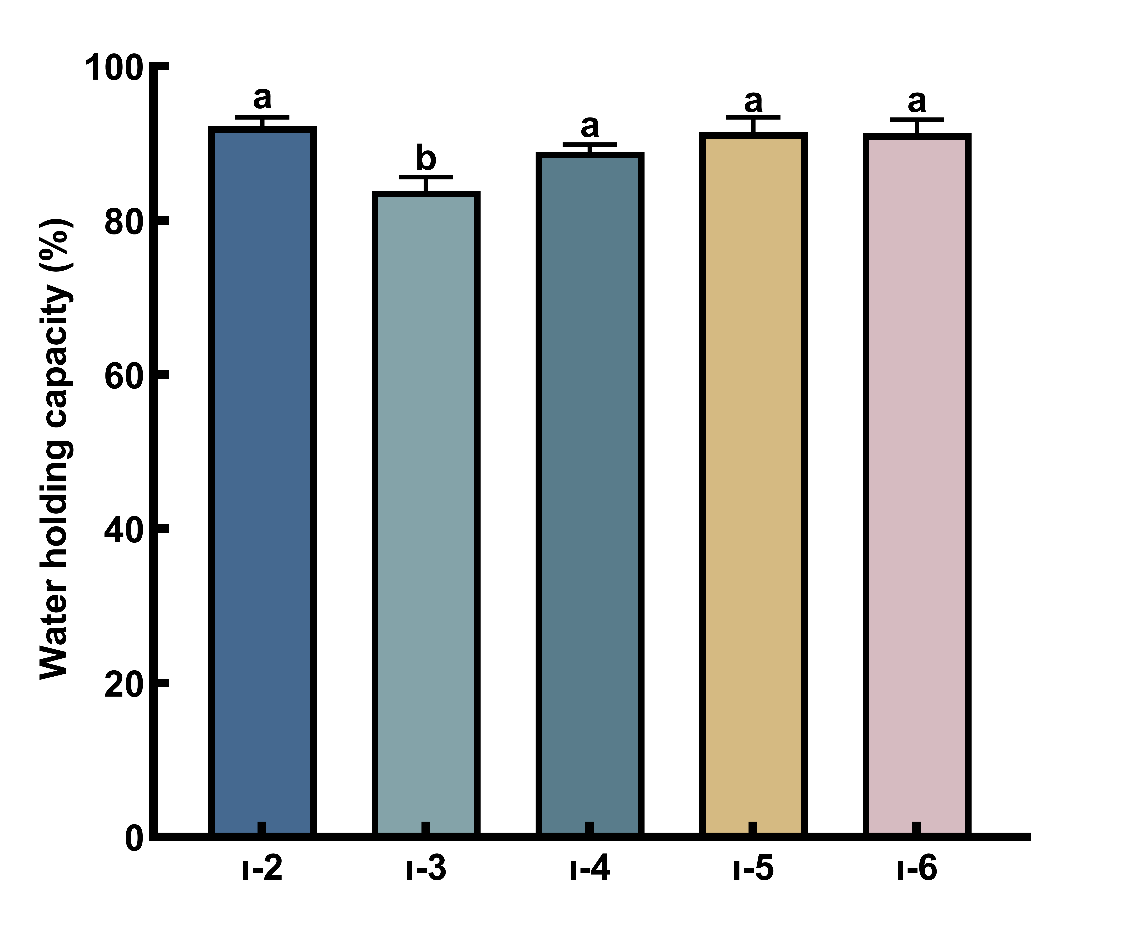


**Fig. 7**


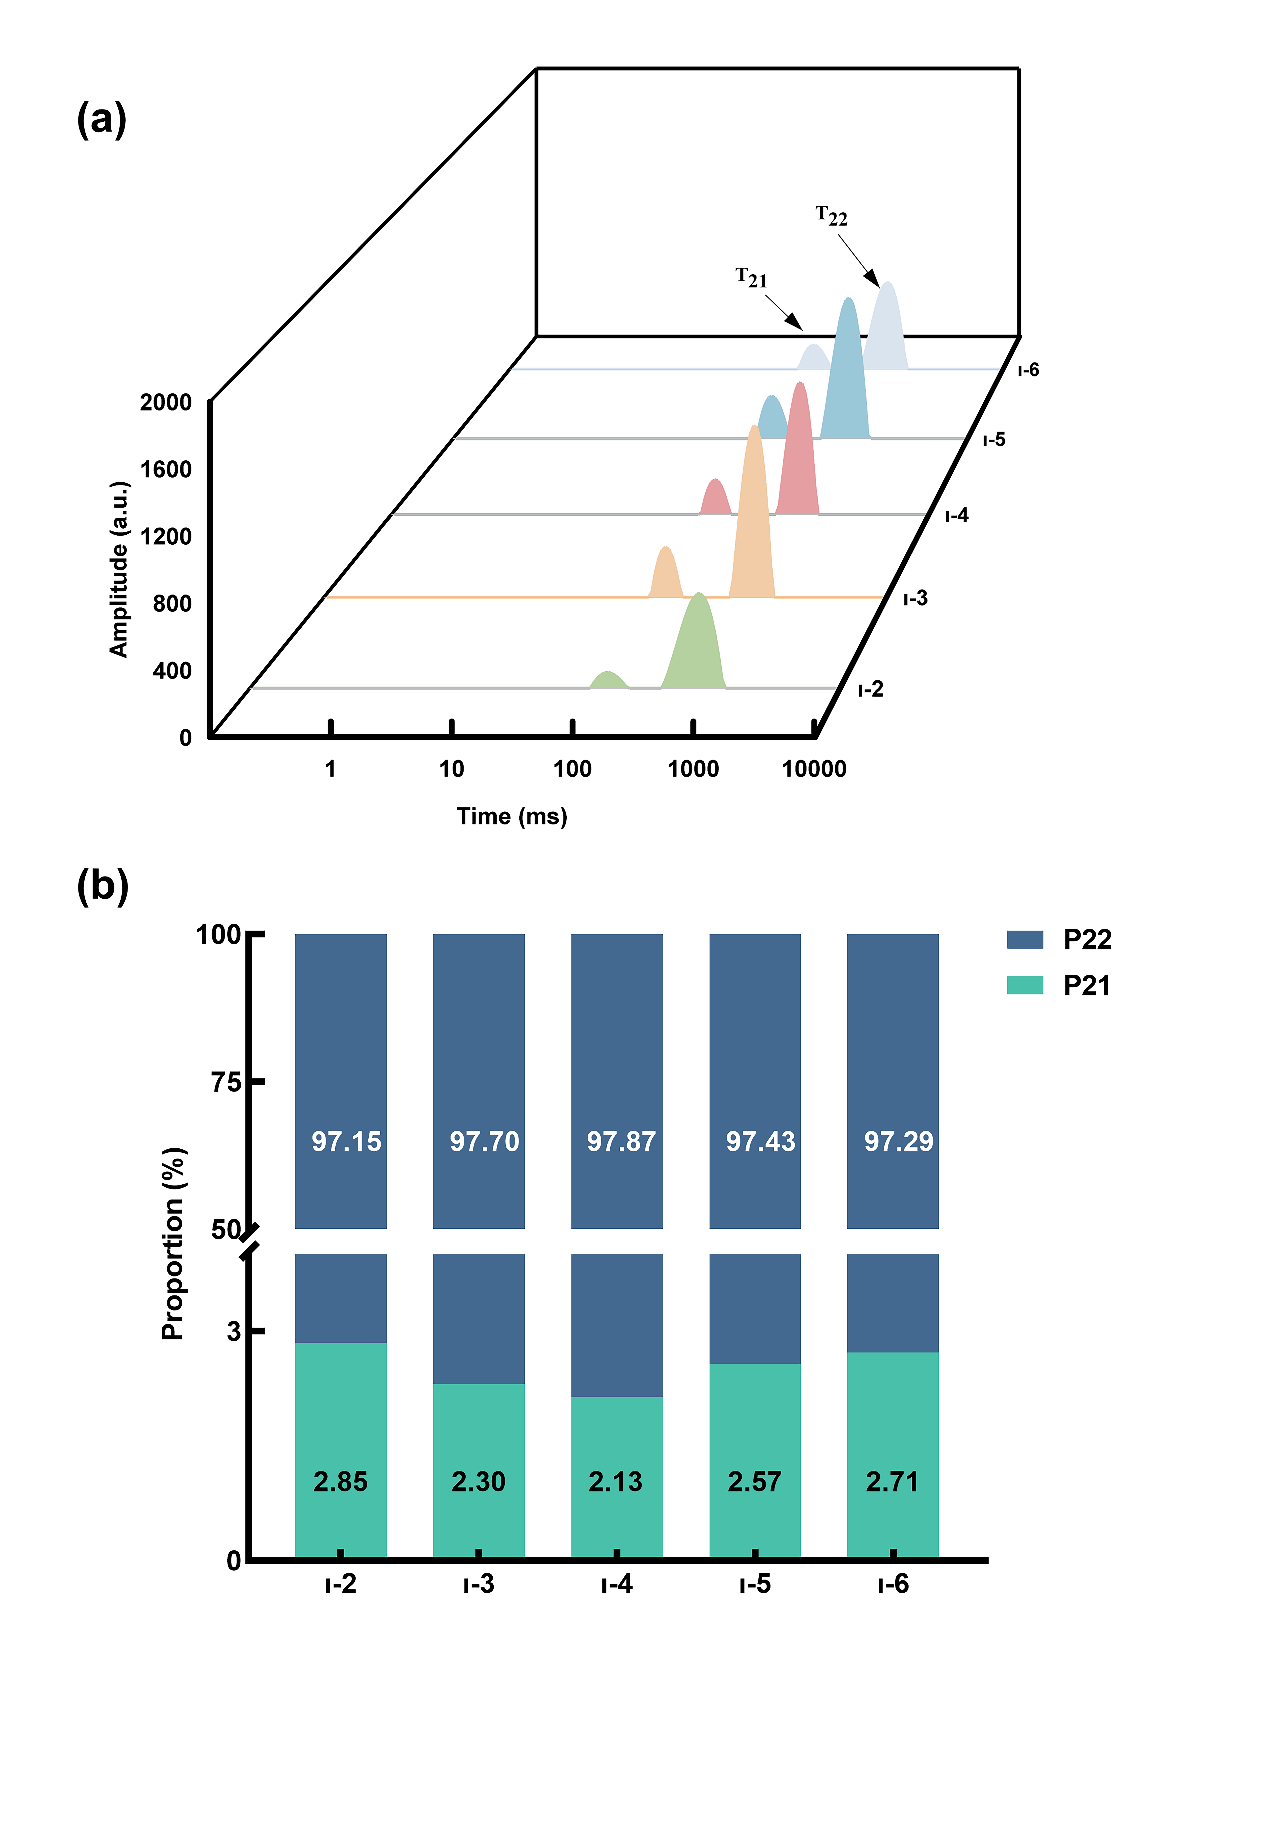


**Fig. 8**


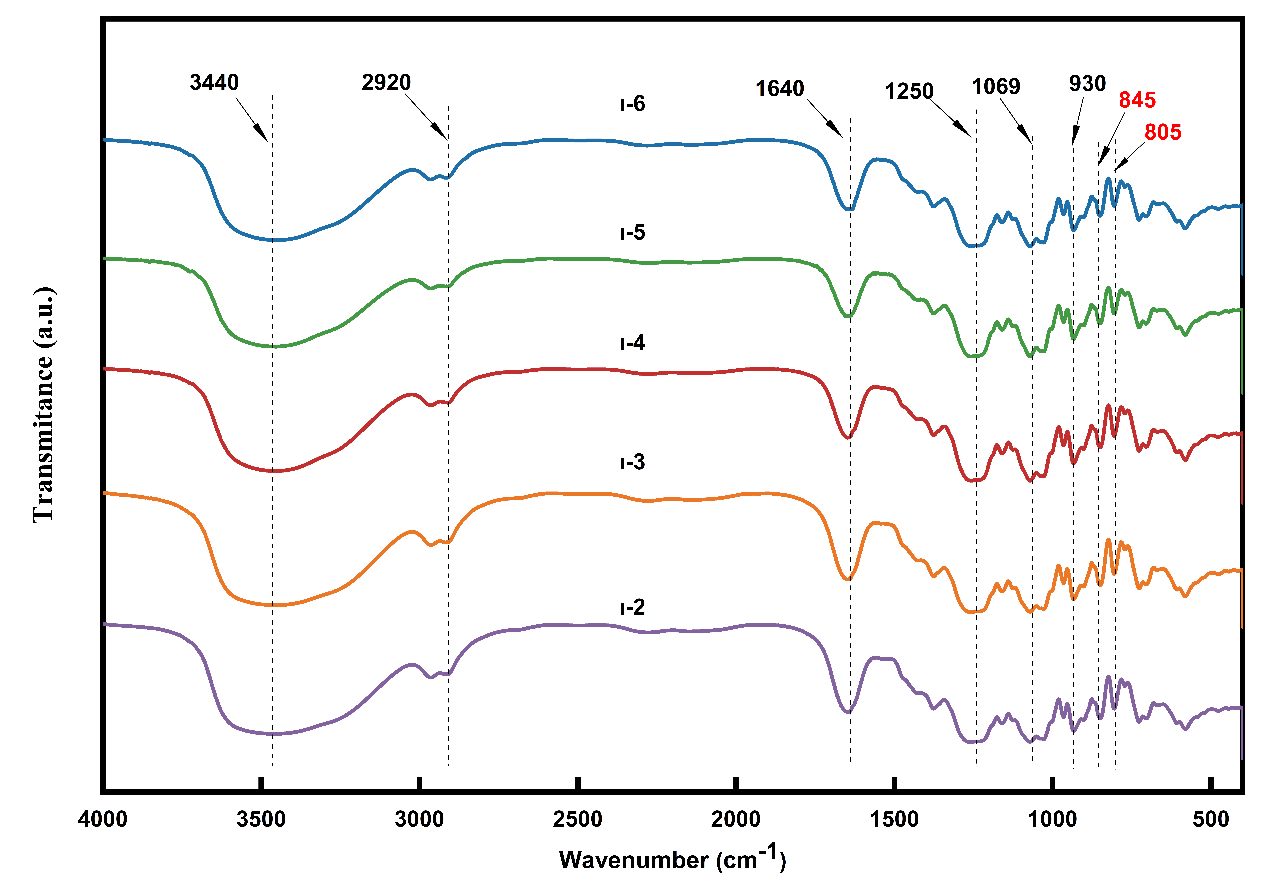


**Fig. 9**


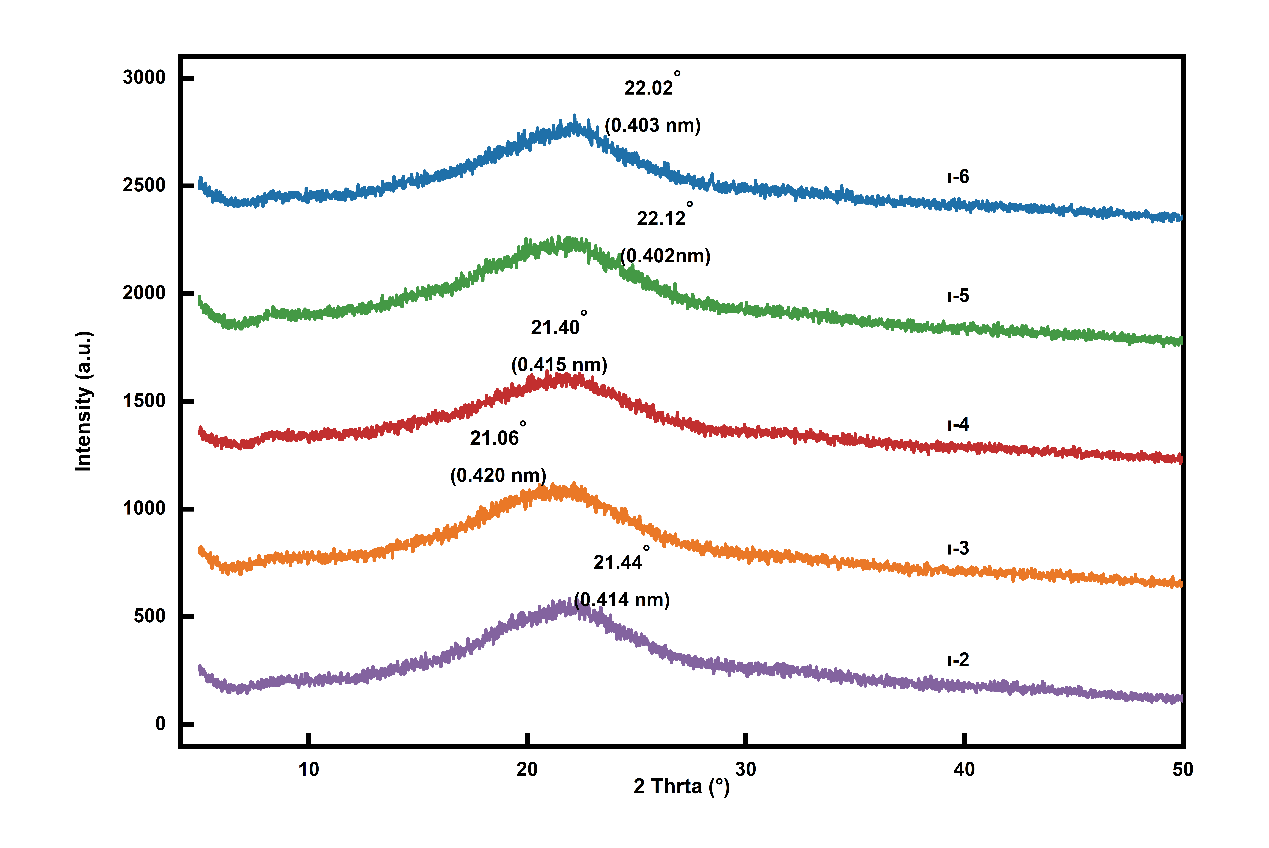


**Fig. 10**


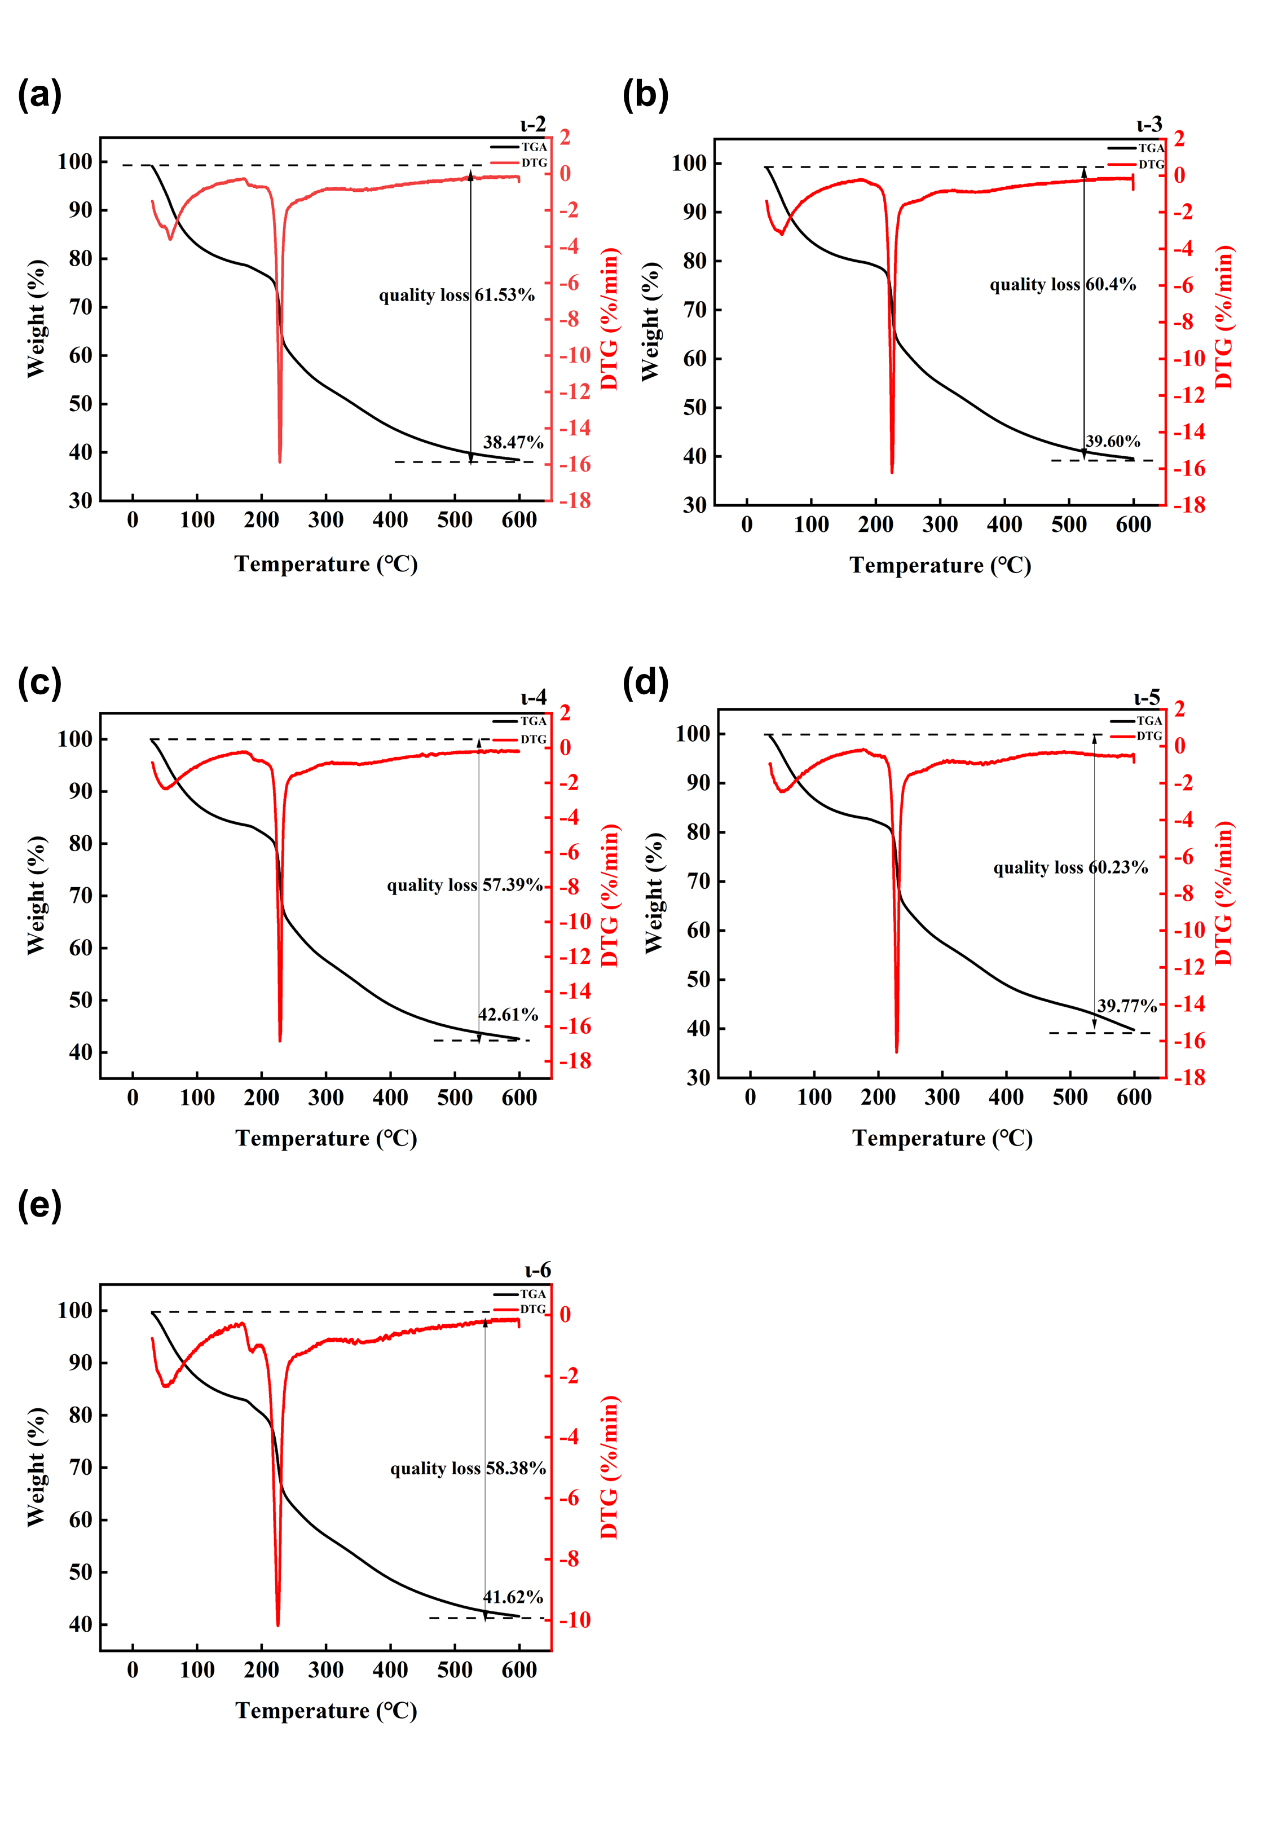

Supplement: Supplementary file 1 [file 03890df3a7ace67a5a1fcb03.docx]
